# Supplementary material for: Skillfully collaborating chemosynthesis with GOx-enabled tumor survival microenvironment deteriorating strategy for amplified chemotherapy and enhanced tumor ablation
Source: Royal Society of Chemistry journal article supplement (doi:10.1039/d0bm01950j), 2020-12-26

## *Supporting Information*

### **Skillfully collaborating chemosynthesis with GO<sub>x</sub>-enabled tumor survival microenvironment deteriorating strategy for amplified chemotherapy and enhanced tumor ablation**

Runxin Lu, Lin Zhou, Qijun Liu, Siqi Wang, Chunyan Yang, Li Hai, Li Guo\* and  
Yong Wu\*

Key Laboratory of Drug-Targeting and Drug Delivery System of the Education Ministry, Sichuan Engineering Laboratory for Plant-Sourced Drug and Sichuan Research Center for Drug Precision Industrial Technology, West China School of Pharmacy, Sichuan University, Chengdu 610041, P. R. China.

\*Corresponding authors: guoli@scu.edu.cn (L. Guo), wyong@scu.edu.cn (Y. Wu).

**Table S1.** Characterization of different PTX-nanocarriers and GOx-nanocarriers. (data represent mean data  $\pm$  SD, n=3).

| Nanocarriers | Size(nm)        | PDI               | EE (%)           | Zeta potential (mV) |
|--------------|-----------------|-------------------|------------------|---------------------|
| PTX-NC       | 123.9 $\pm$ 1.2 | 0.176 $\pm$ 0.027 | 86.65 $\pm$ 1.59 | -1.36 $\pm$ 0.48    |
| PTX-RNC      | 118.8 $\pm$ 2.6 | 0.217 $\pm$ 0.038 | 90.77 $\pm$ 1.11 | 9.51 $\pm$ 0.39     |
| PTX-BNC      | 139.5 $\pm$ 1.7 | 0.122 $\pm$ 0.015 | 95.60 $\pm$ 2.18 | -14.12 $\pm$ 0.36   |
| PTX-BRNC     | 147.9 $\pm$ 1.3 | 0.171 $\pm$ 0.019 | 94.92 $\pm$ 1.27 | -9.67 $\pm$ 0.23    |
| GOx-BRNC     | 161.4 $\pm$ 1.9 | 0.176 $\pm$ 0.015 | 12.27 $\pm$ 1.35 | -13.04 $\pm$ 0.21   |

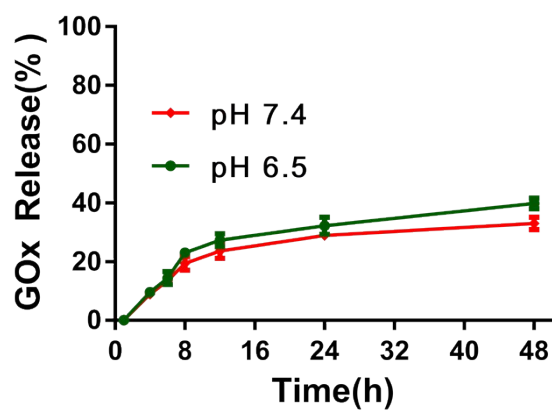

**Figure S1.** Cumulative GOx release of GOx-BRNC in PBS (pH 7.4 and 6.5) at 37 °C (Means  $\pm$  SD, n = 3).

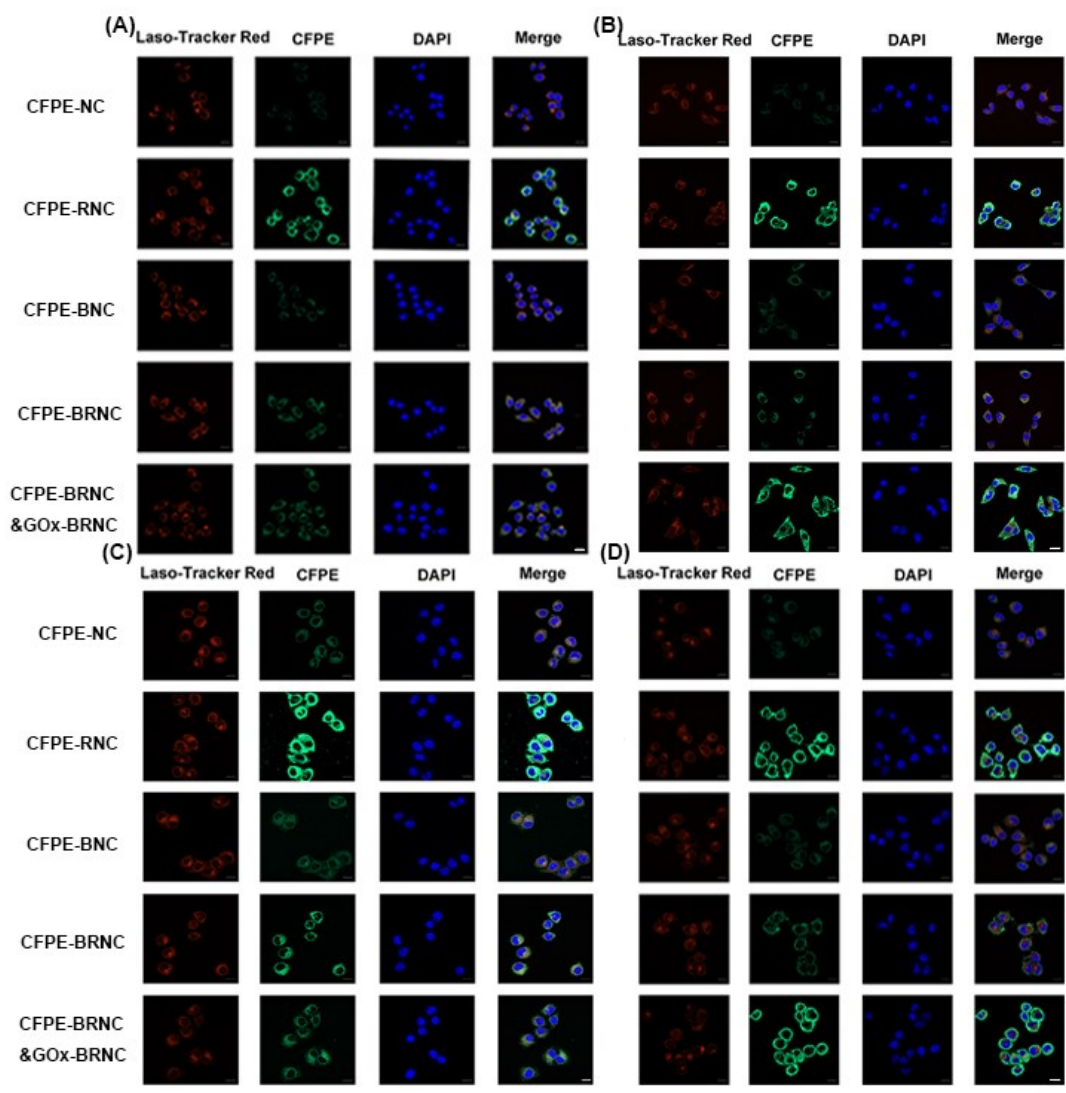

**Figure S2.** Colocalization of cells after incubation with different nanocarriers for 2h at pH 7.4 and pH 6.5. Confocal laser scanning microscopy (CLSM) images on 4T1 cells at pH 7.4 (A) and pH 6.5 (B), MCF7 cells at pH 7.4 (C) and pH 6.5 (D), showing FITC channel (green), LysoTracker-stained lysosome channel (red), and DAPI-stained nucleus channel (blue), the scale bar represents 20 μm.

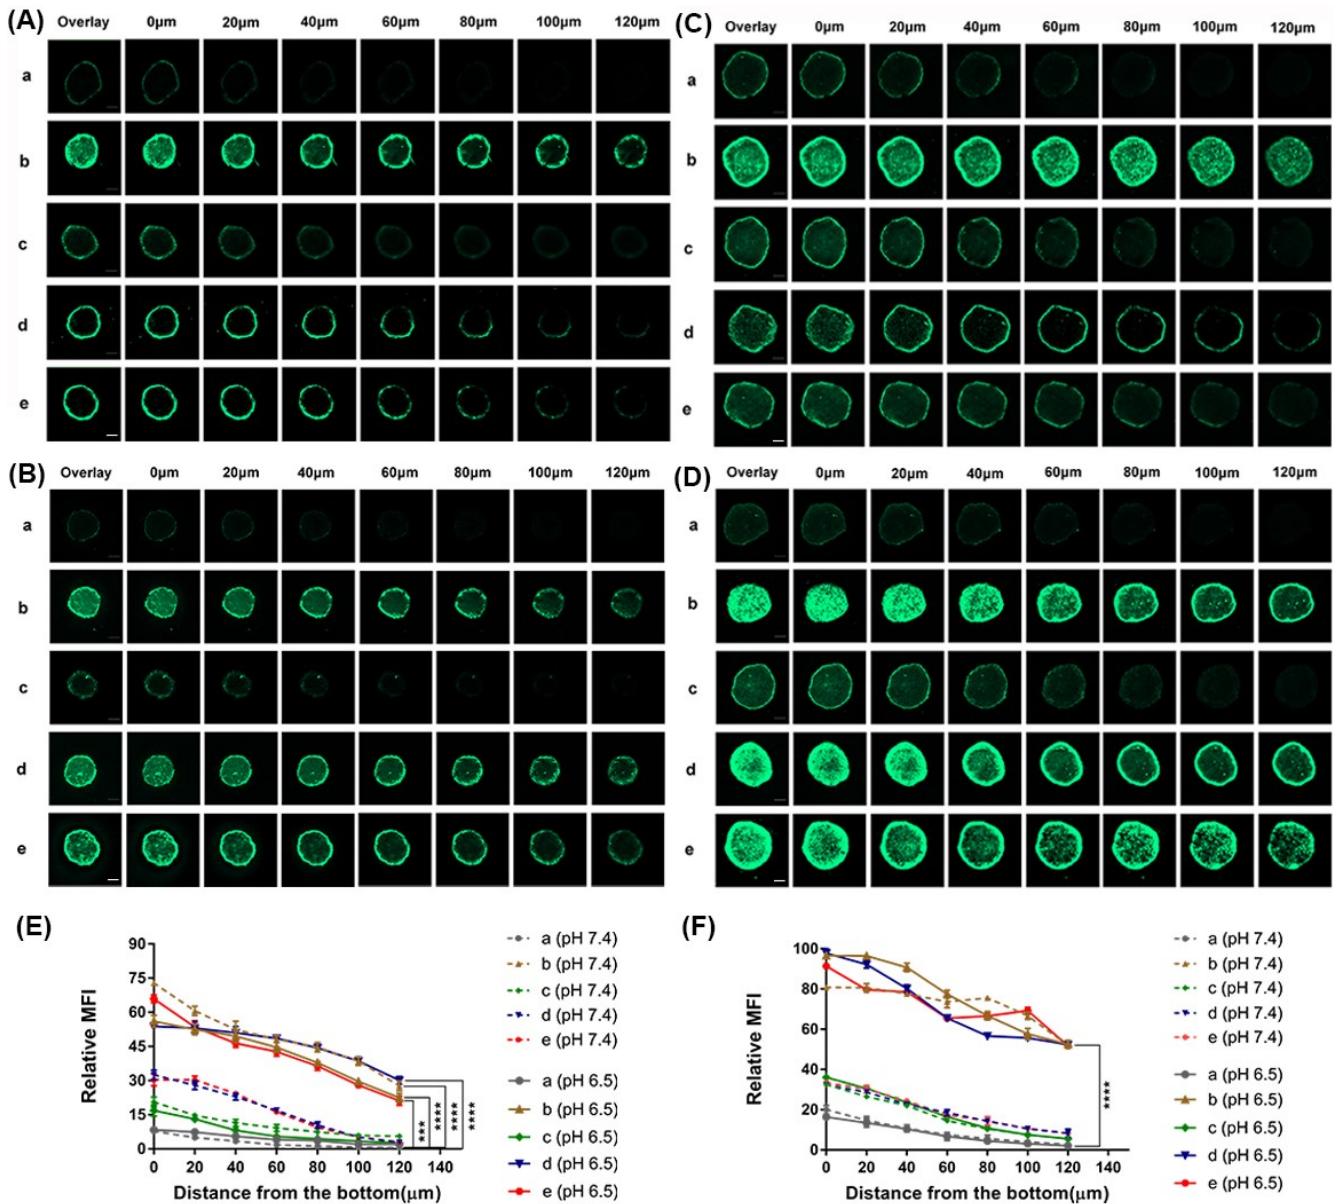

**Figure S3.** Tumor spheroids penetration. (A) and (C) were the fluorescence distribution of 4T1 and MCF7 tumor spheroids under pH=7.4 conditions, respectively. (B) and (D) were the fluorescence distribution of 4T1 and MCF7 tumor spheroids under pH 6.5 conditions, respectively. The concentration of CFPE was 2  $\mu\text{g}/\text{mL}$ . (E) and (F) were the semi-quantitative intensity of these nanocarriers of 4T1 and MCF7 tumor spheroids, bars represent 100  $\mu\text{m}$  ((a) CFPE-NC, (b) CFPE-RNC, (c) CFPE-BNC, (d) CFPE-BRNC, (e) CFPE-BRNC&GO<sub>x</sub>-BRNC) (Means  $\pm$  SD, n = 3, \*\*\*\* indicates  $p < 0.0001$  versus NC).

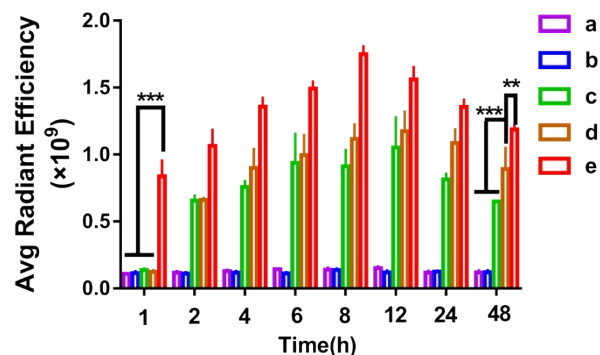

**Figure S4.** The semi-quantitative radiant efficiency of tumor measured by imaging ((a) DiD-NC, (b) DiD-RNC, (c) DiD-BNC, (d) DiD-BRNC, (e) DiD-BRNC&GOx-BRNC) (Means  $\pm$  SD, n = 3, \*\* indicates  $p < 0.01$ , \*\*\* indicates  $p < 0.001$ ).

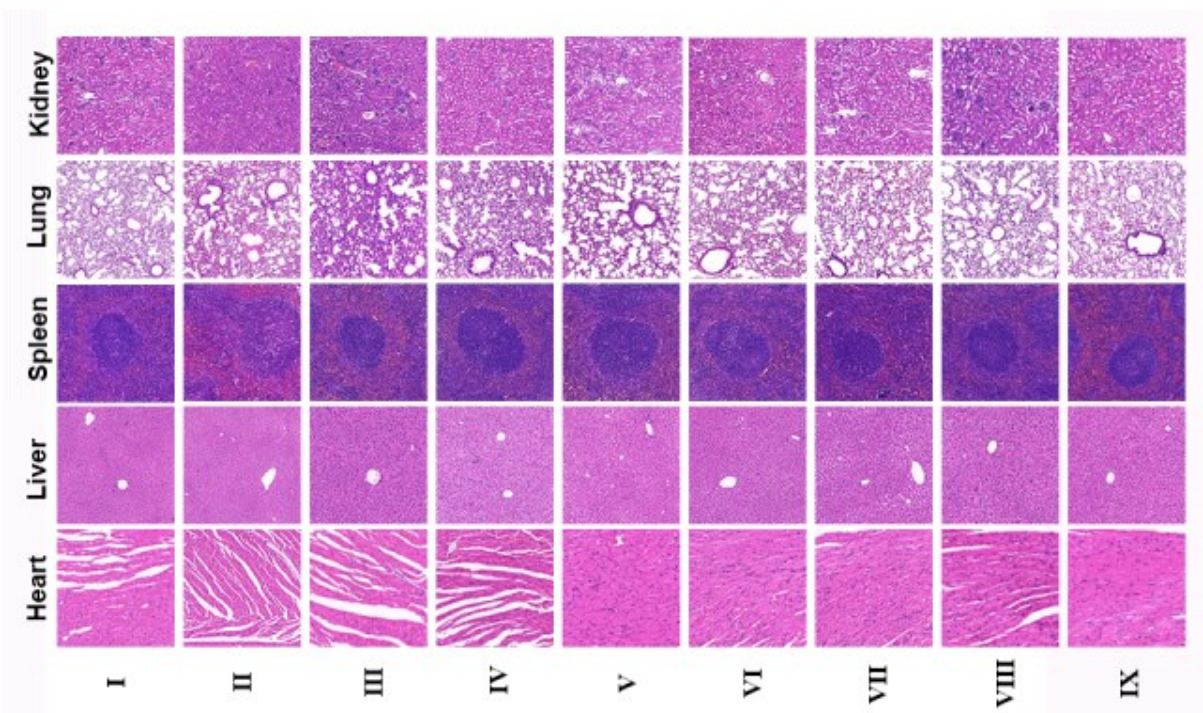

**Figure S5.** H&E analyses of the major organs (heart, liver, spleen, lung and kidney) after treatments of PBS (I), PTX (II), PTX-NC (III), PTX-RNC (IV), PTX-BNC (V), PTX-BRNC (VI), GOx-BRNC (VII), PTX-BRNC&GOx-BRNC (VIII, PTX=1 mg kg<sup>-1</sup>), PTX-BRNC&GOx-BRNC (IX, PTX=3 mg kg<sup>-1</sup>), and the scale bar represents 100  $\mu$ m.

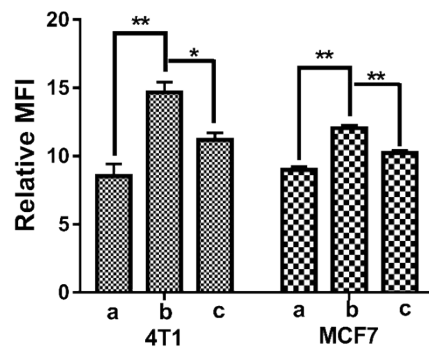

**Figure S6.** Biotin competitive inhibition experiment. The relative uptake of CFPE-BNC on 4T1 cells and MCF-7 cells for 2 h after pre-incubation with unlabeled biotin (1.5 mM) determined by flow cytometer ((a) CFPE-NC, (b) CFPE-BNC, (c) unlabeled biotin+CFPE-BNC) (Means  $\pm$  SD, n= 3, \*, \*\* represent  $p < 0.05$ ,  $p < 0.01$  versus CFPE-BNC group).

Figure S7.  $^1\text{H-NMR}$  of compound **2**

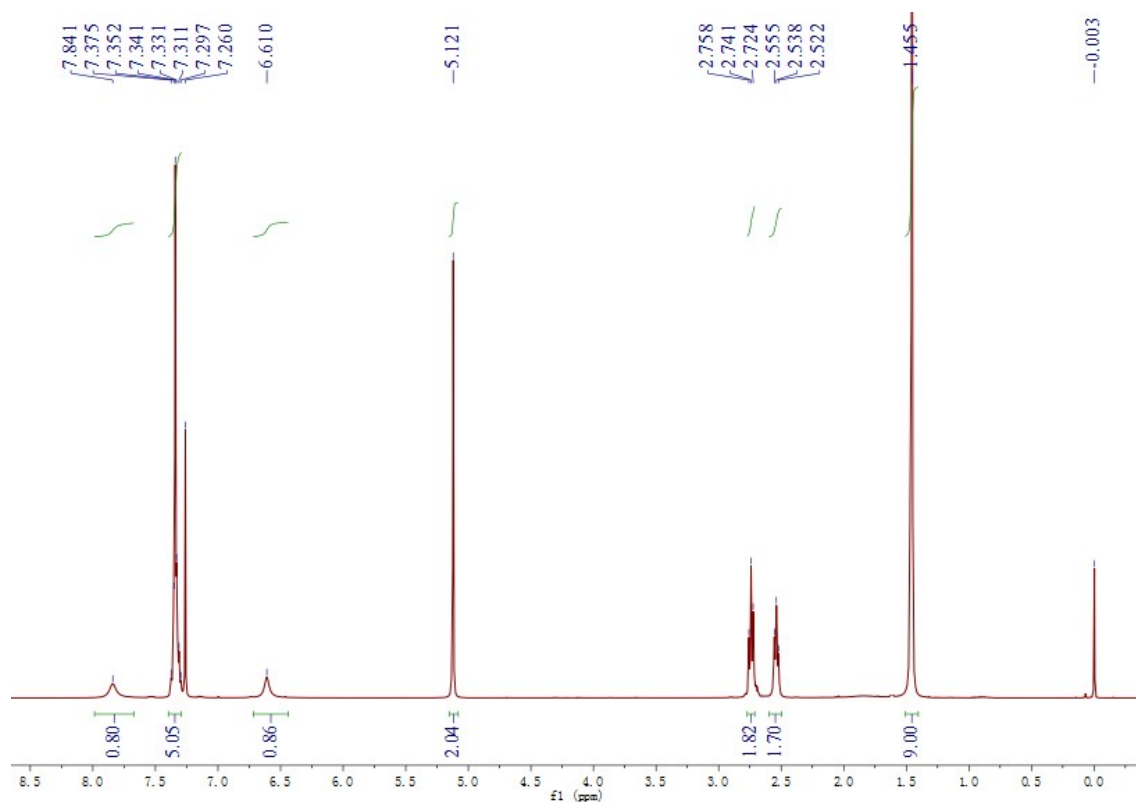

Figure S8.  $^{13}\text{C-NMR}$  of compound **2**

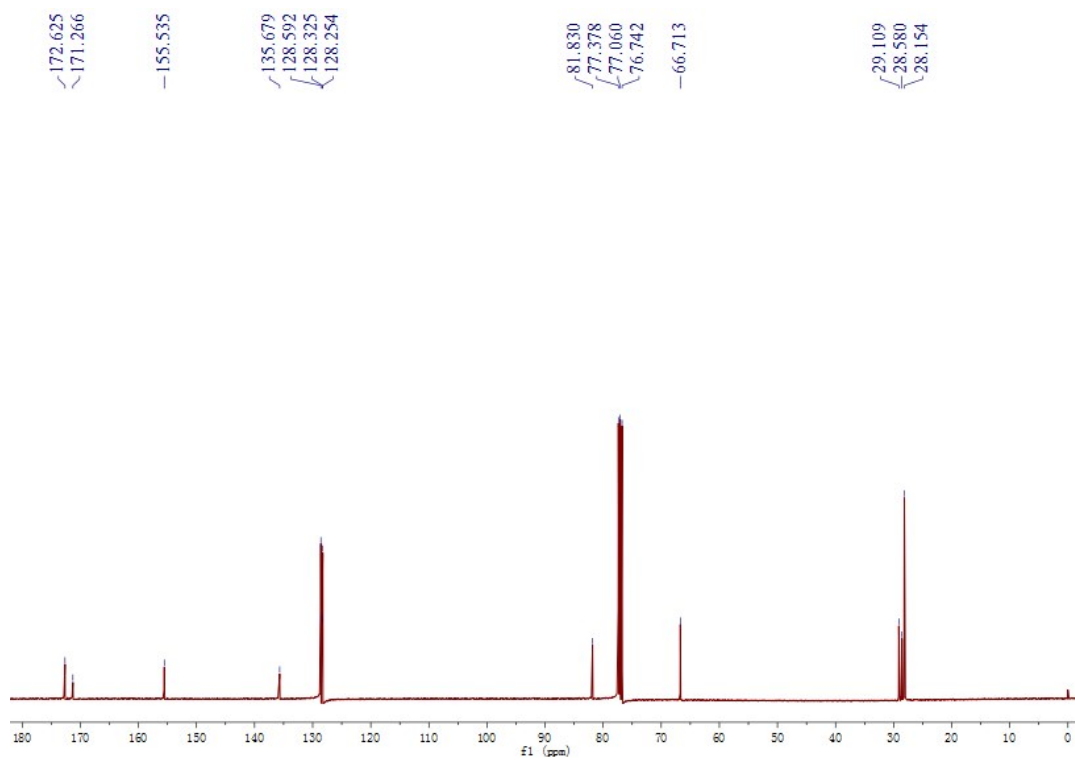

**Figure S9.**  $^1\text{H-NMR}$  of compound **3**

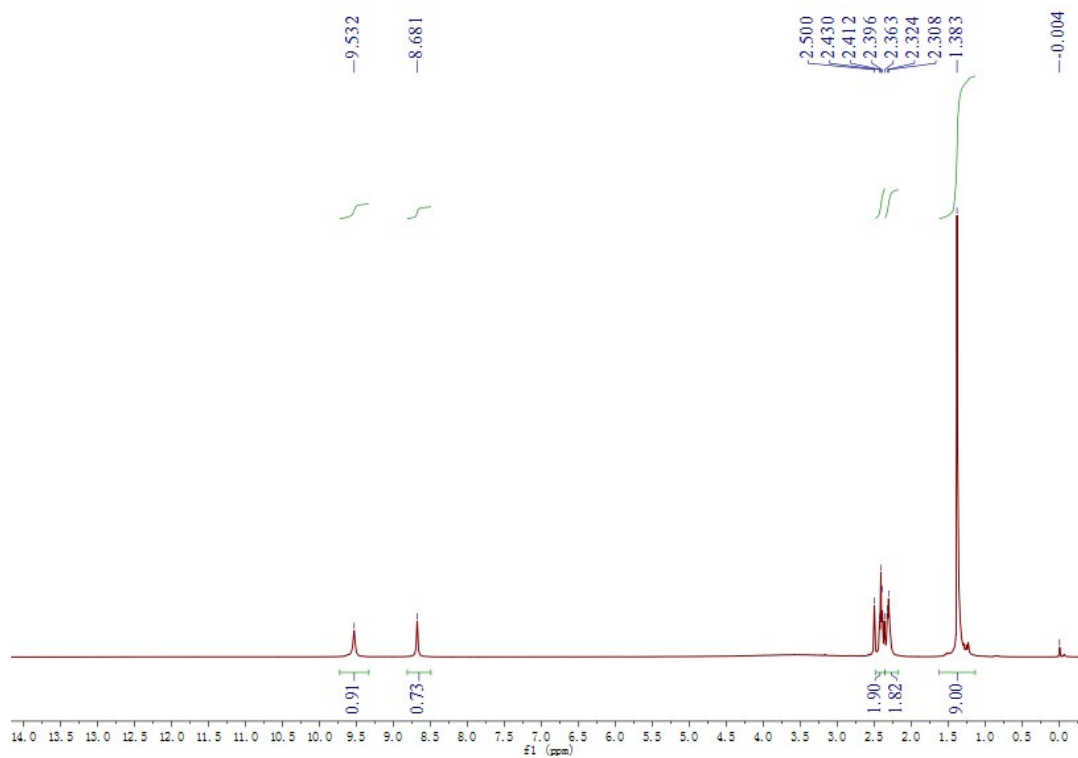

**Figure S10.**  $^{13}\text{C-NMR}$  of compound **3**

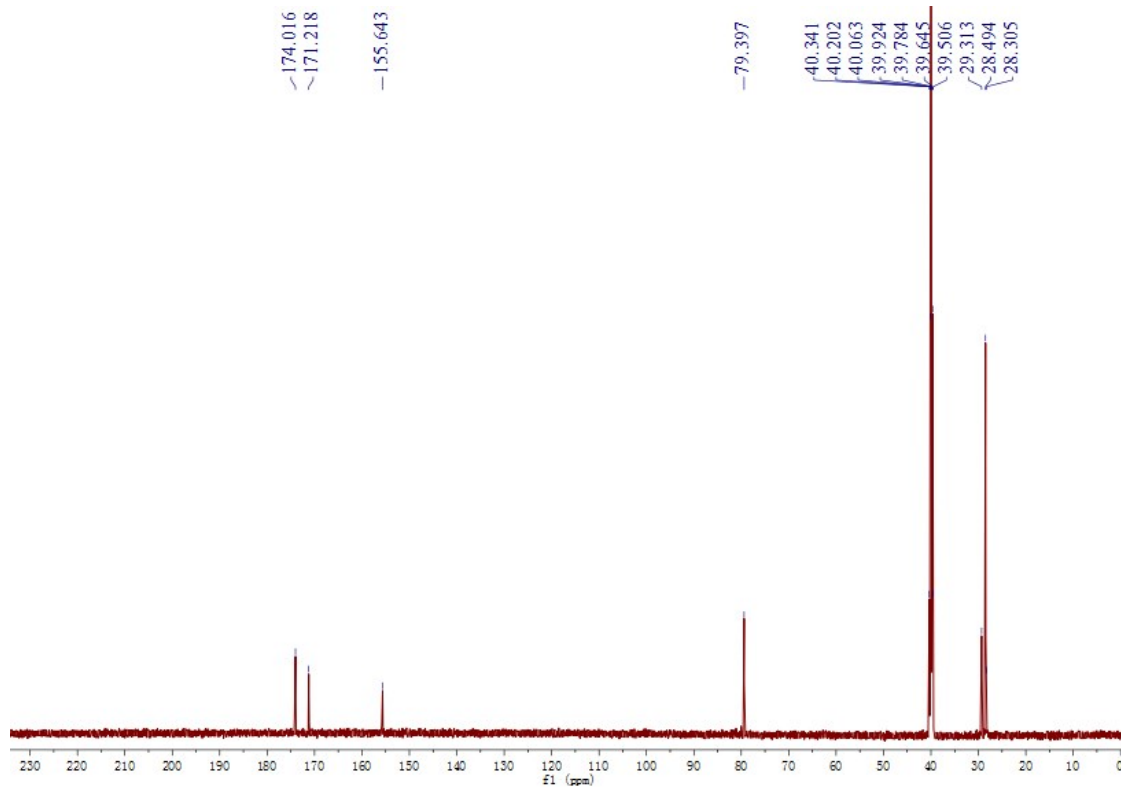



Figure S11. <sup>1</sup>H-NMR of compound 7

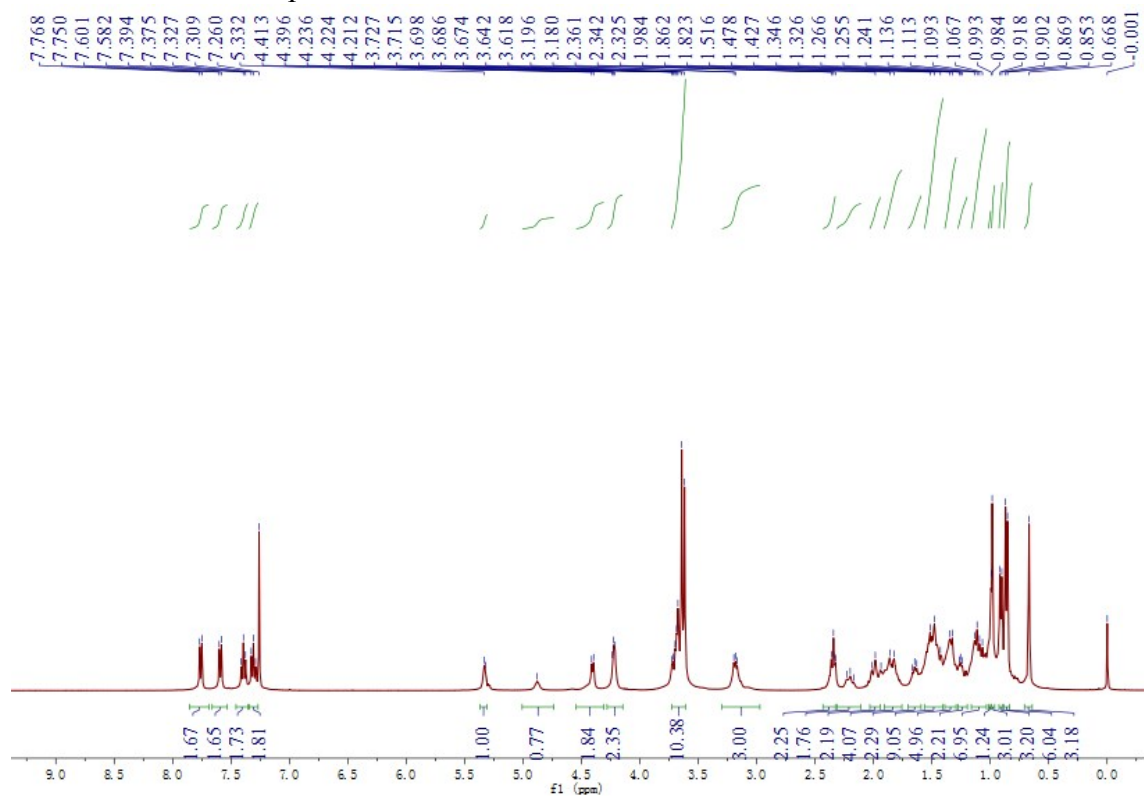

Figure S12. <sup>13</sup>C-NMR of compound 7

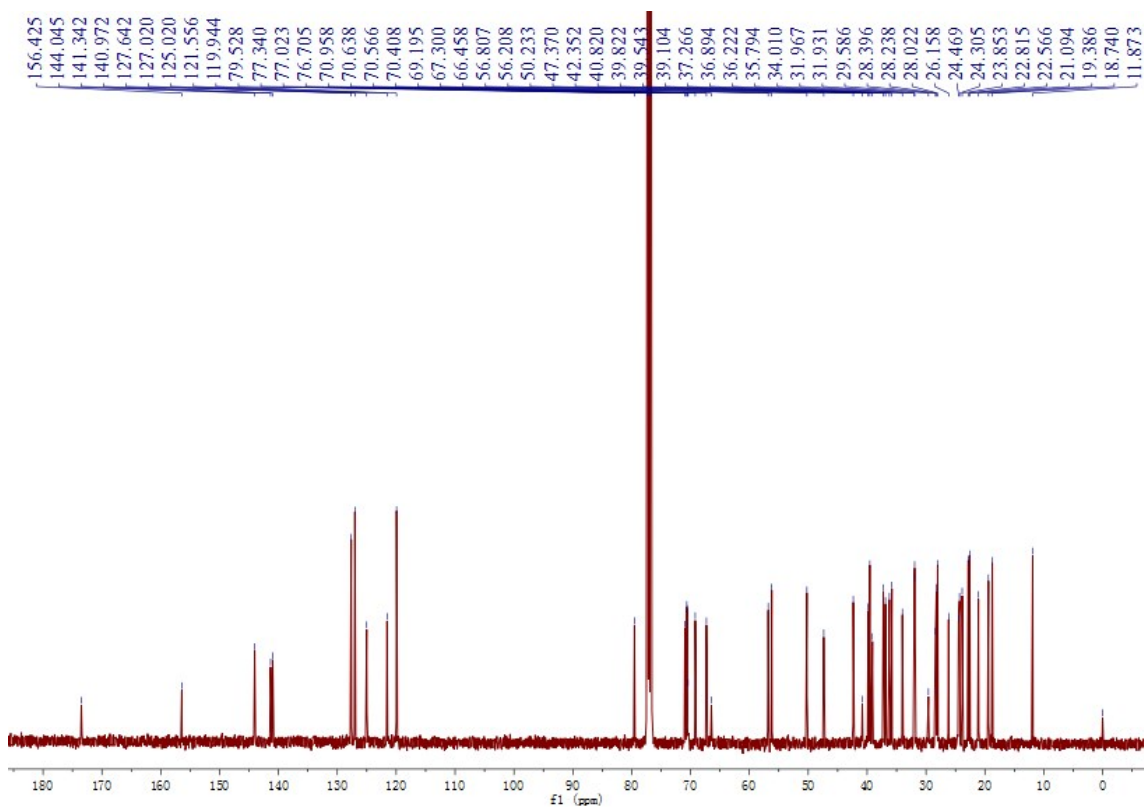

Figure S13. HR-MS of compound 7

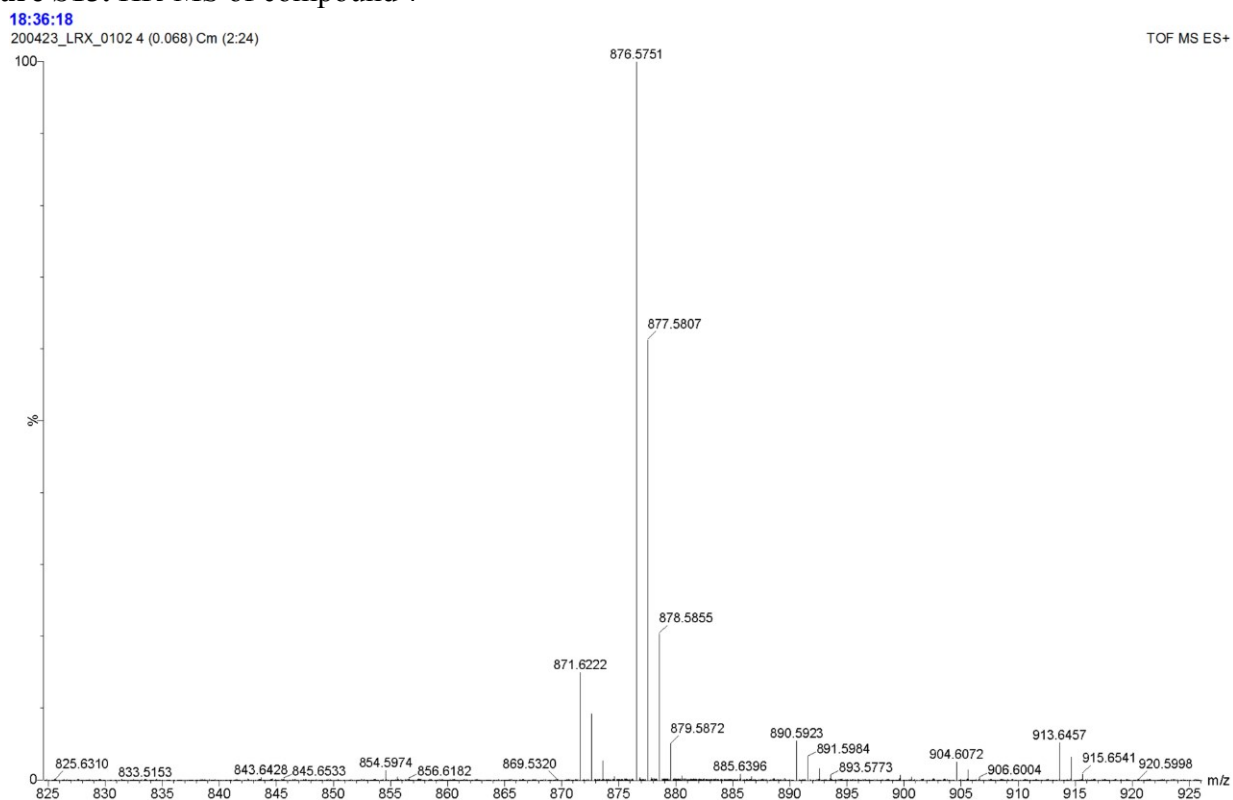

Figure S14. <sup>1</sup>H-NMR of compound 8

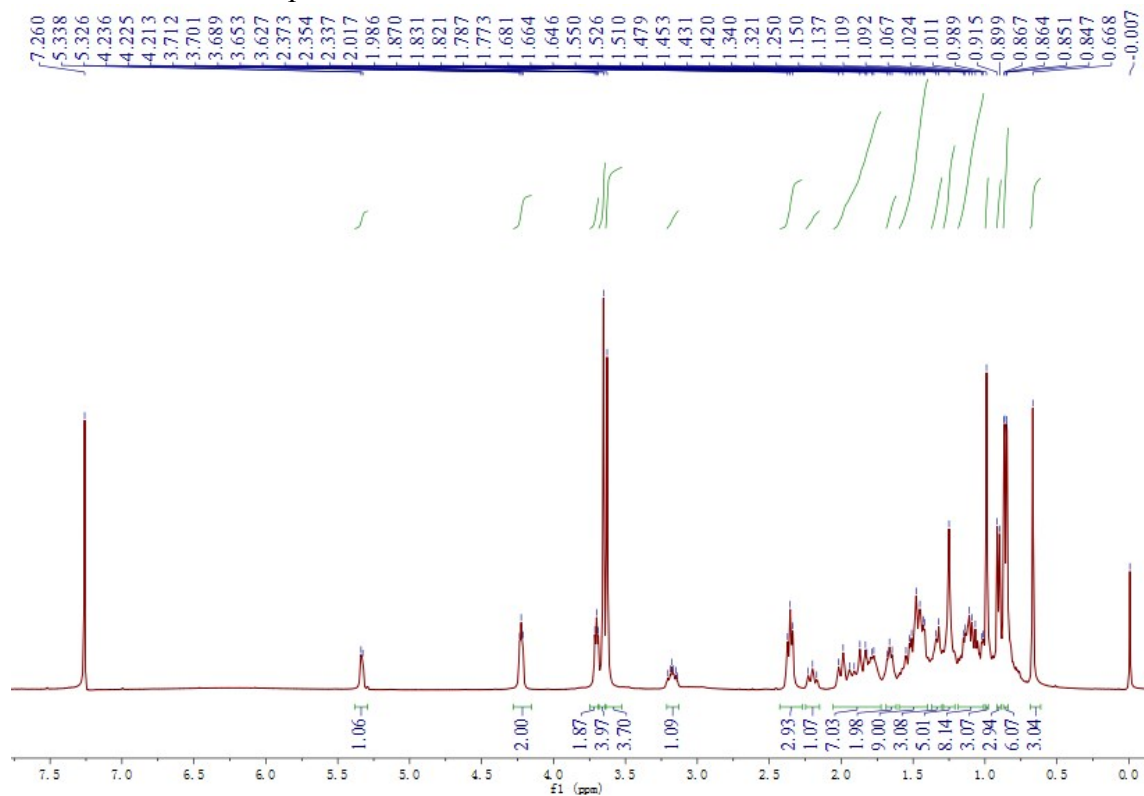

Figure S15. HR-MS of compound 8

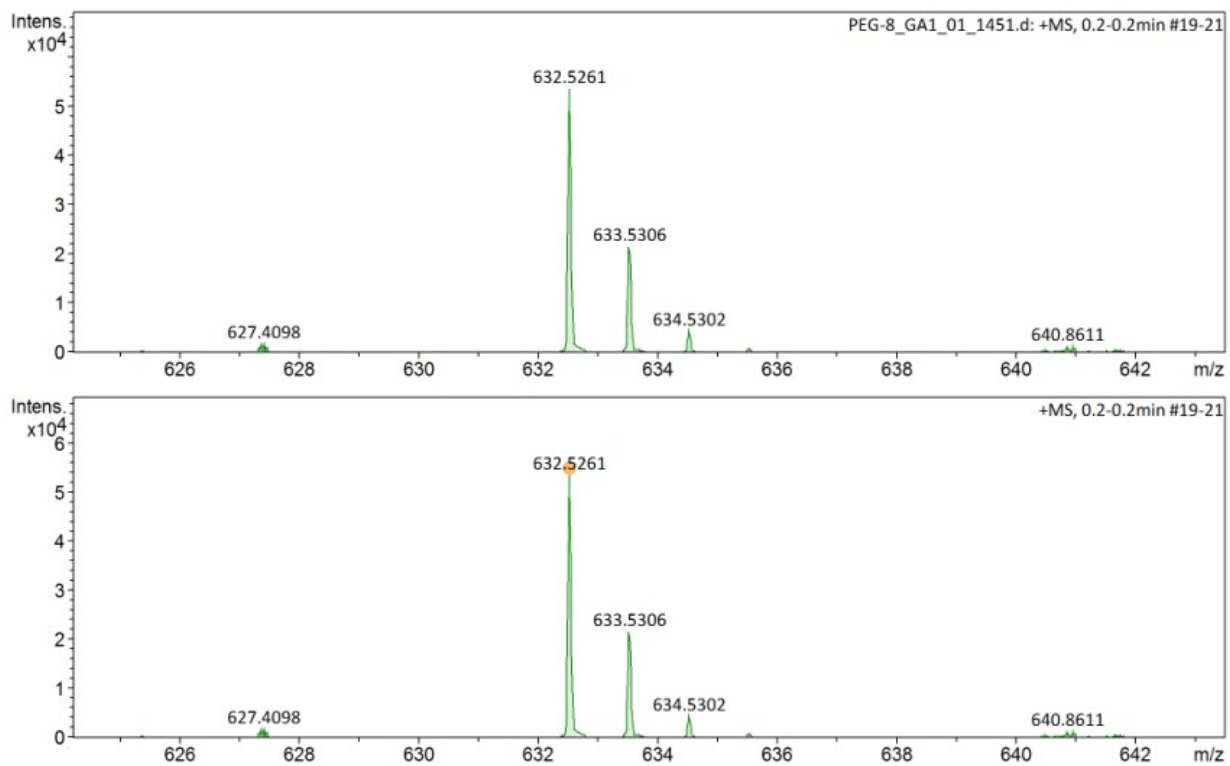

Figure S16. <sup>1</sup>H-NMR of compound 9

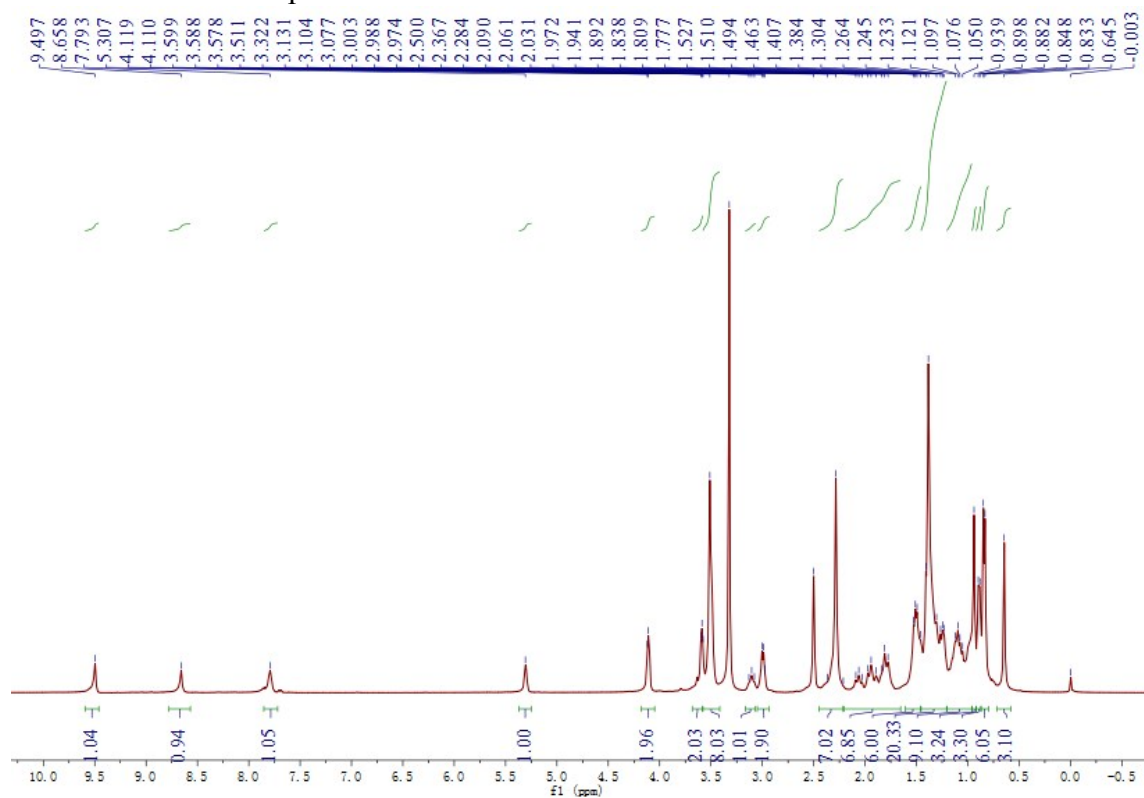

Figure S17. HR-MS of compound 9

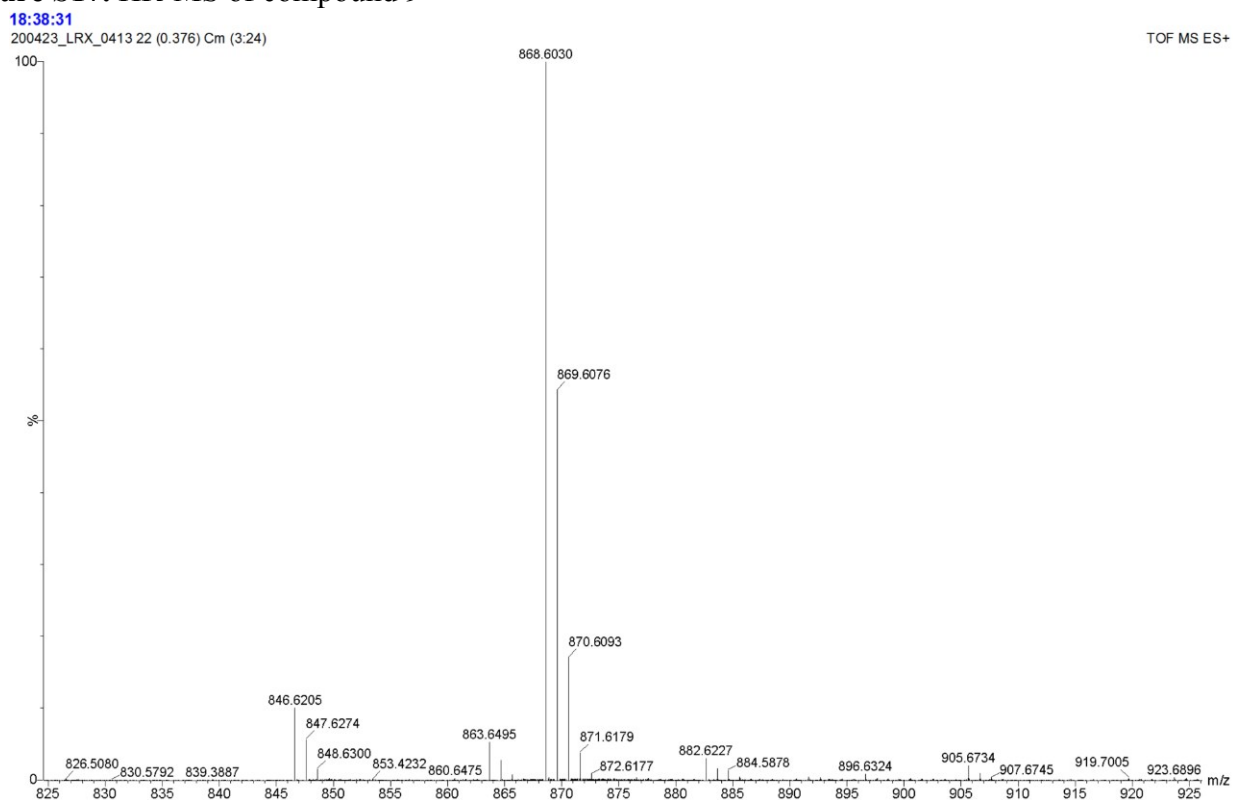

Figure S18. <sup>1</sup>H-NMR of compound 10

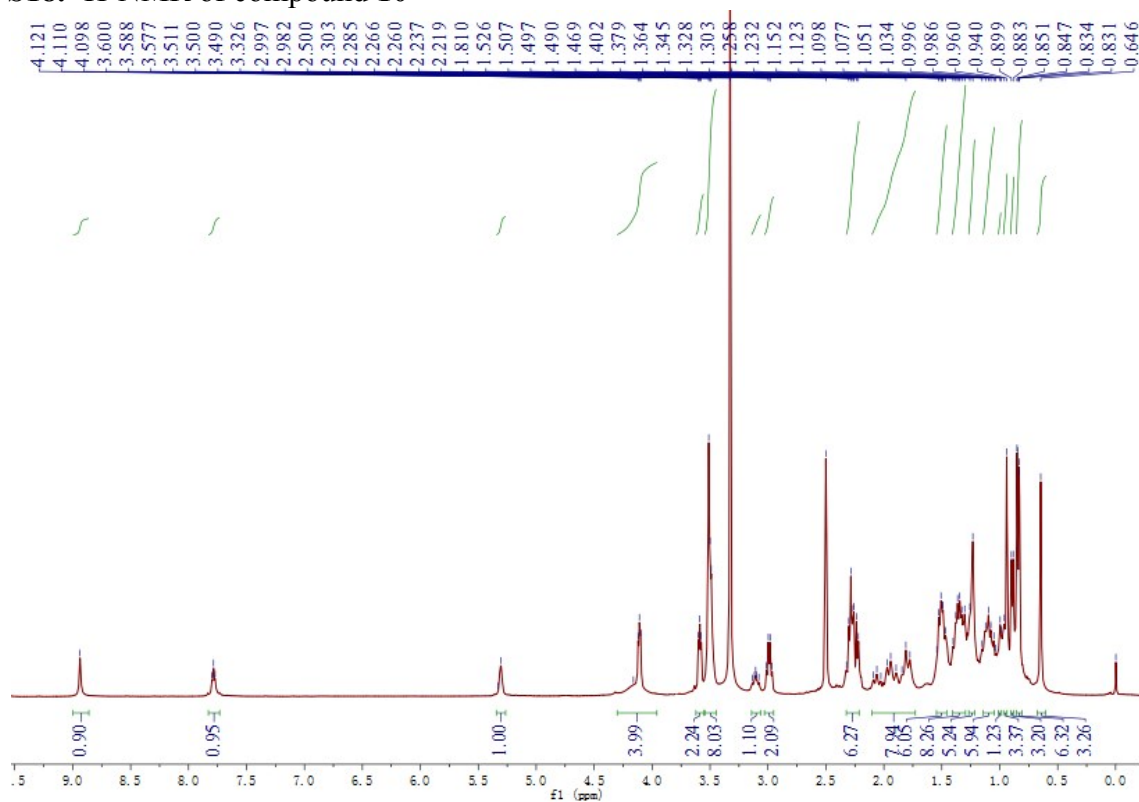

**Figure S19.** HR-MS of compound **10**

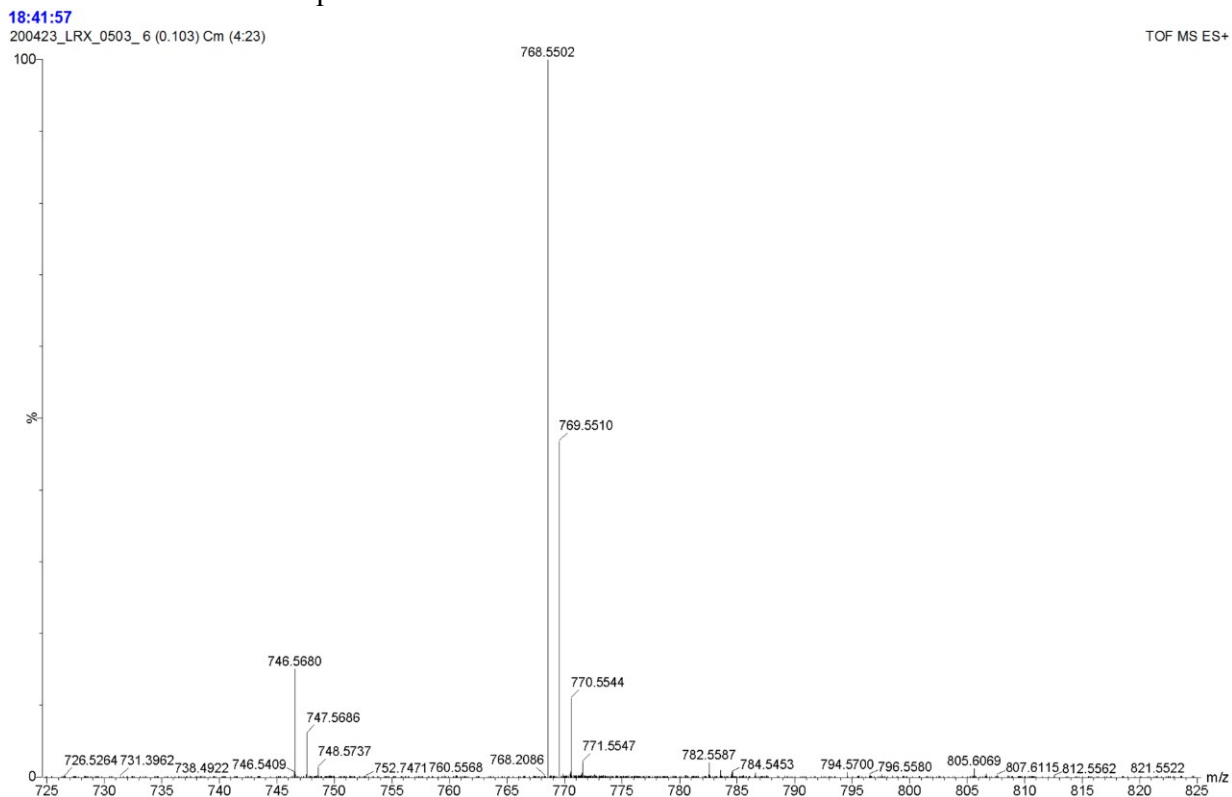

**Figure S20.**  $^1\text{H-NMR}$  of compound **12**

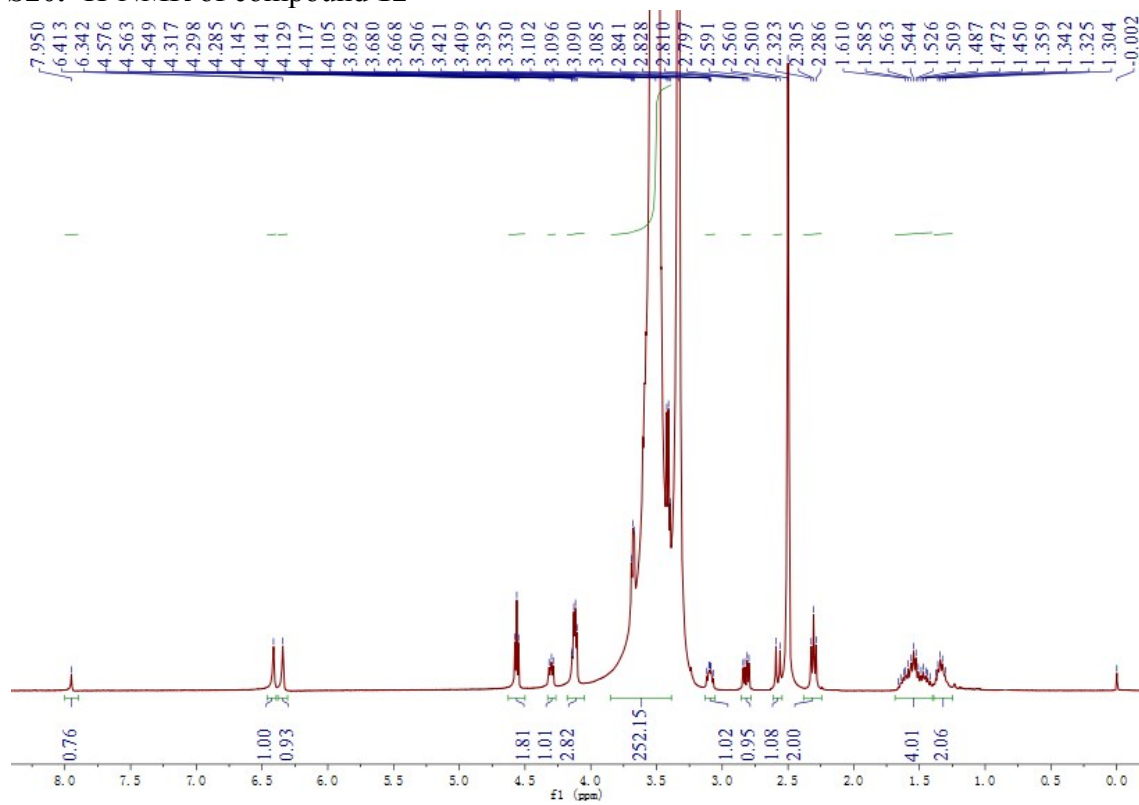

Figure S21. HR-MS of compound 12

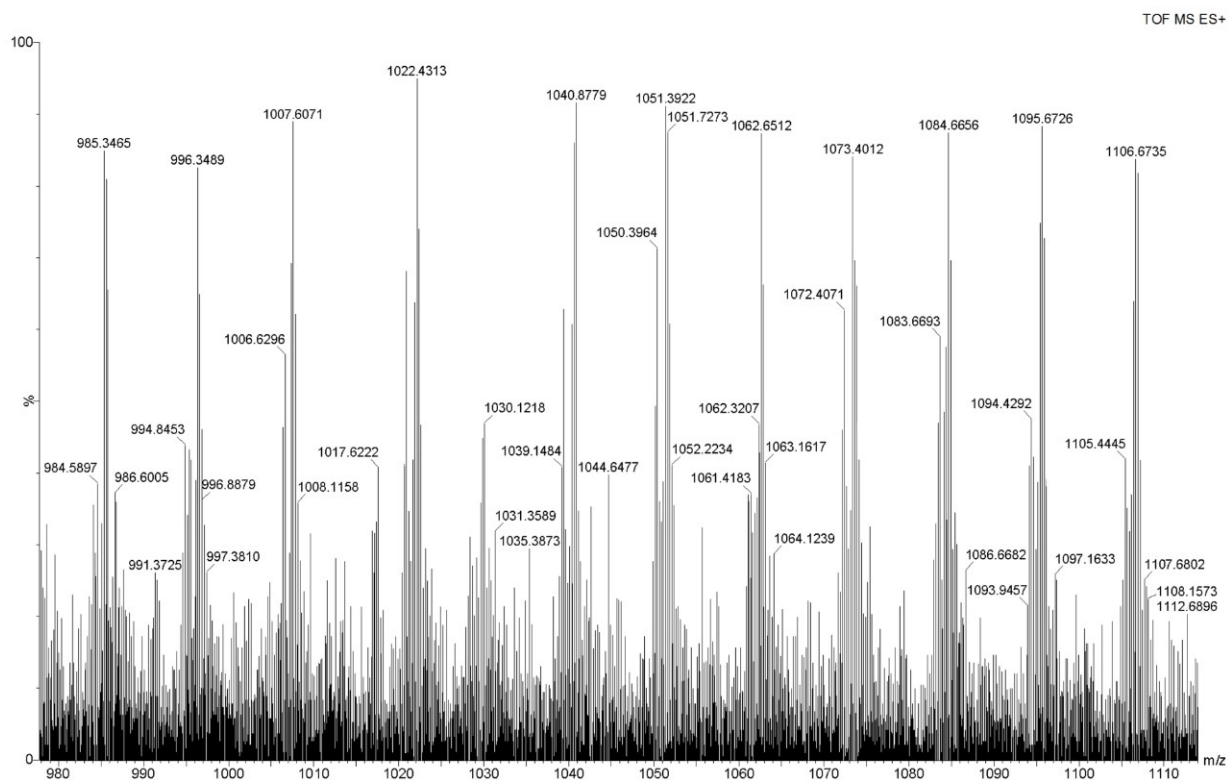

Figure S22. <sup>1</sup>H-NMR of compound 13

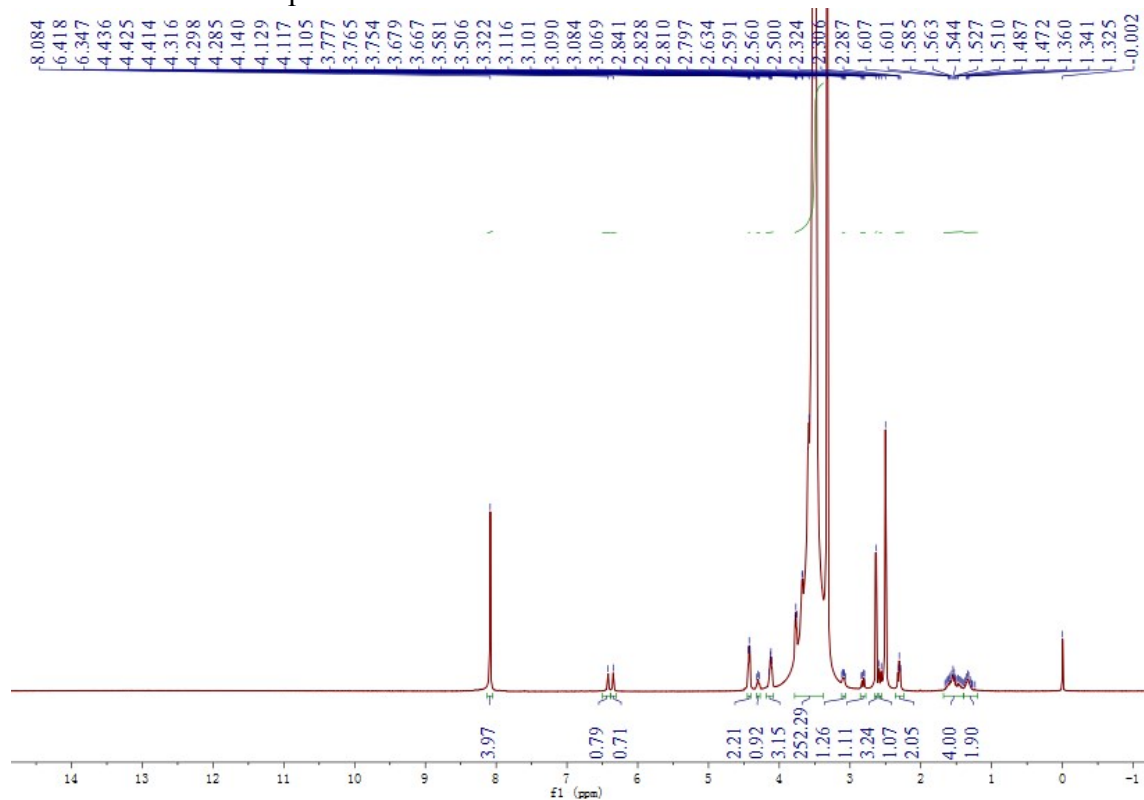

Figure S23. HR-MS of compound 13

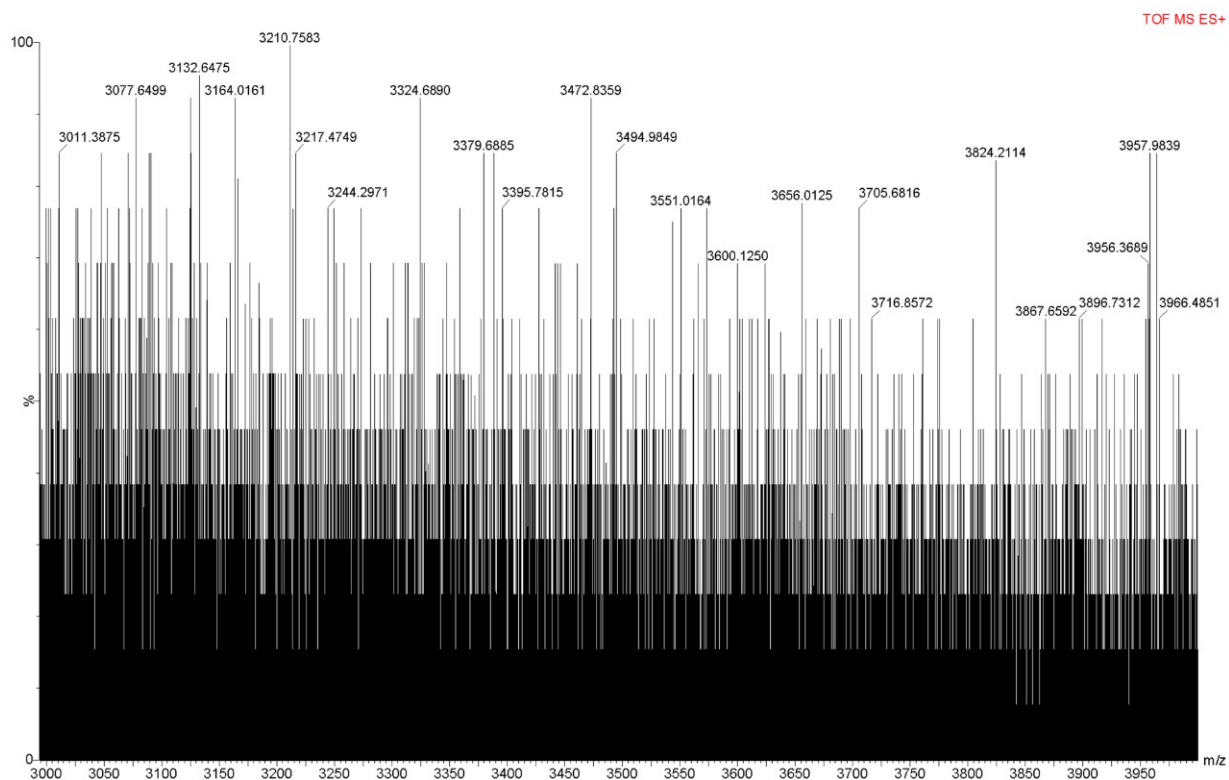

Figure S24. <sup>1</sup>H-NMR of ligand Bio-PEG<sub>3350</sub>-Hz-Chol

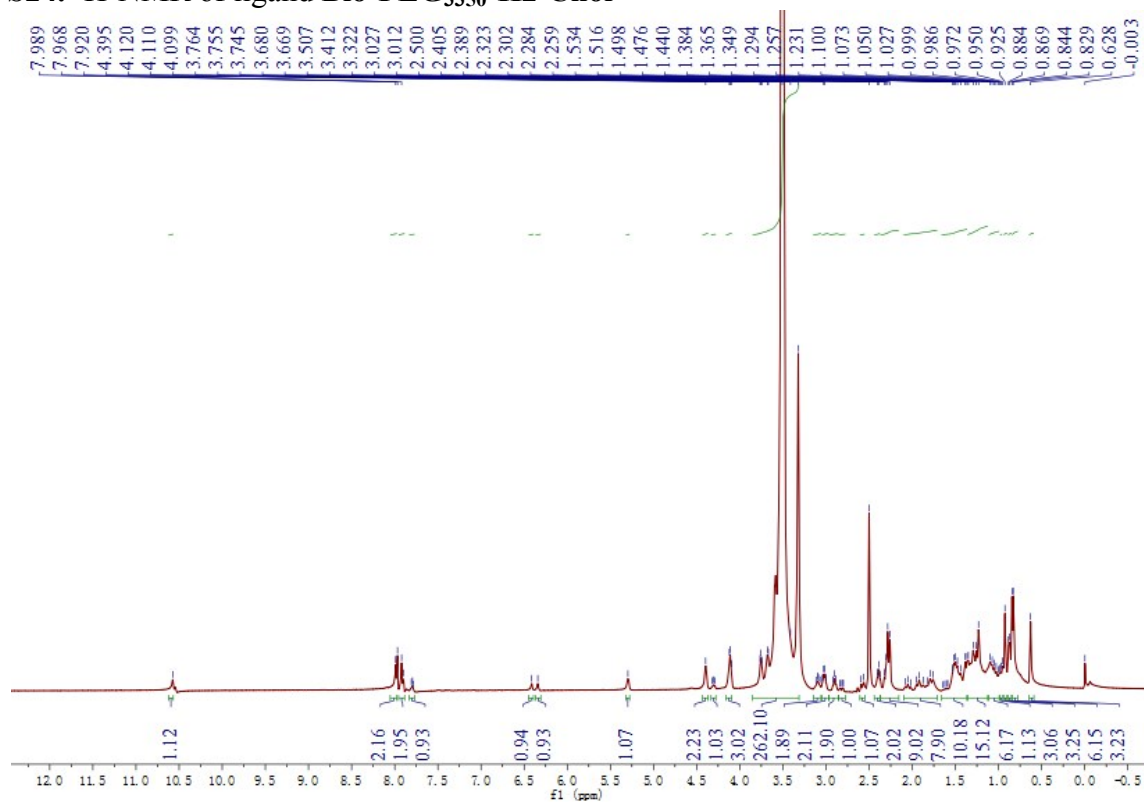

Figure S25. HR-MS of compound **Bio-PEG<sub>3350</sub>-Hz-Chol**

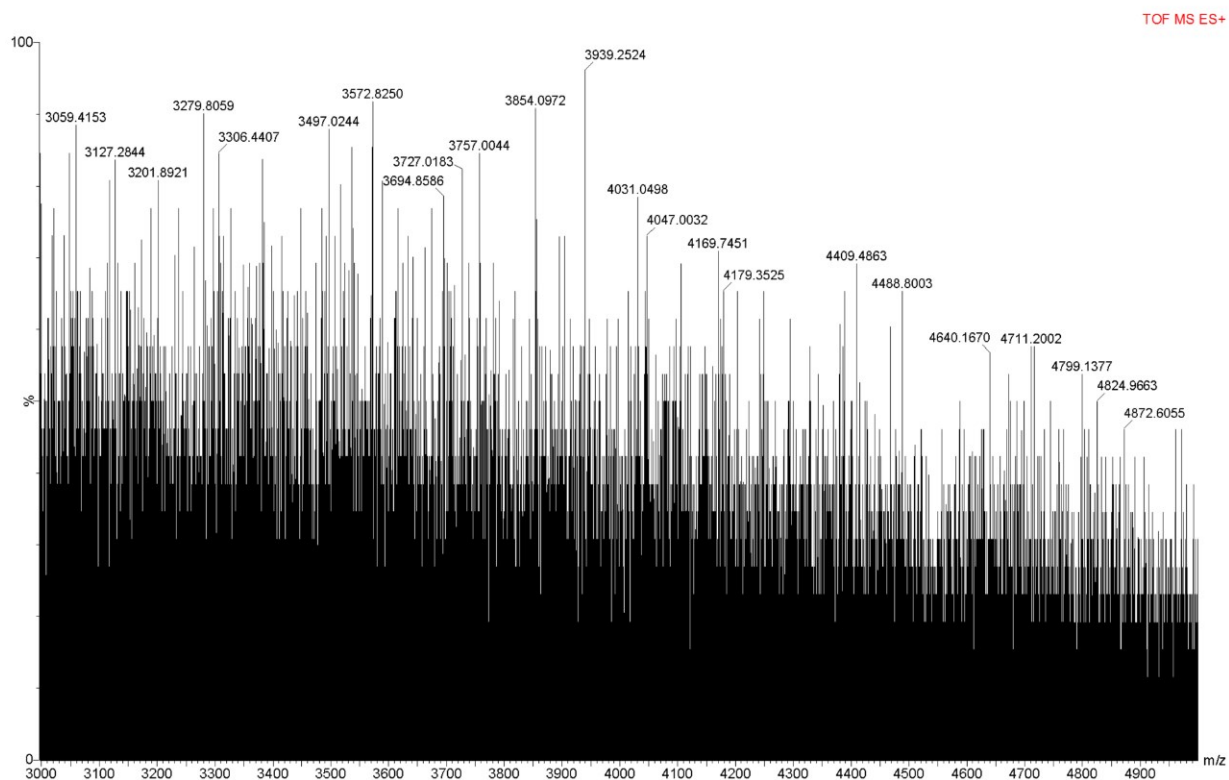

Figure S26. <sup>1</sup>H-NMR of ligand **DSPE-PEG<sub>2000</sub>-R<sub>8</sub>**

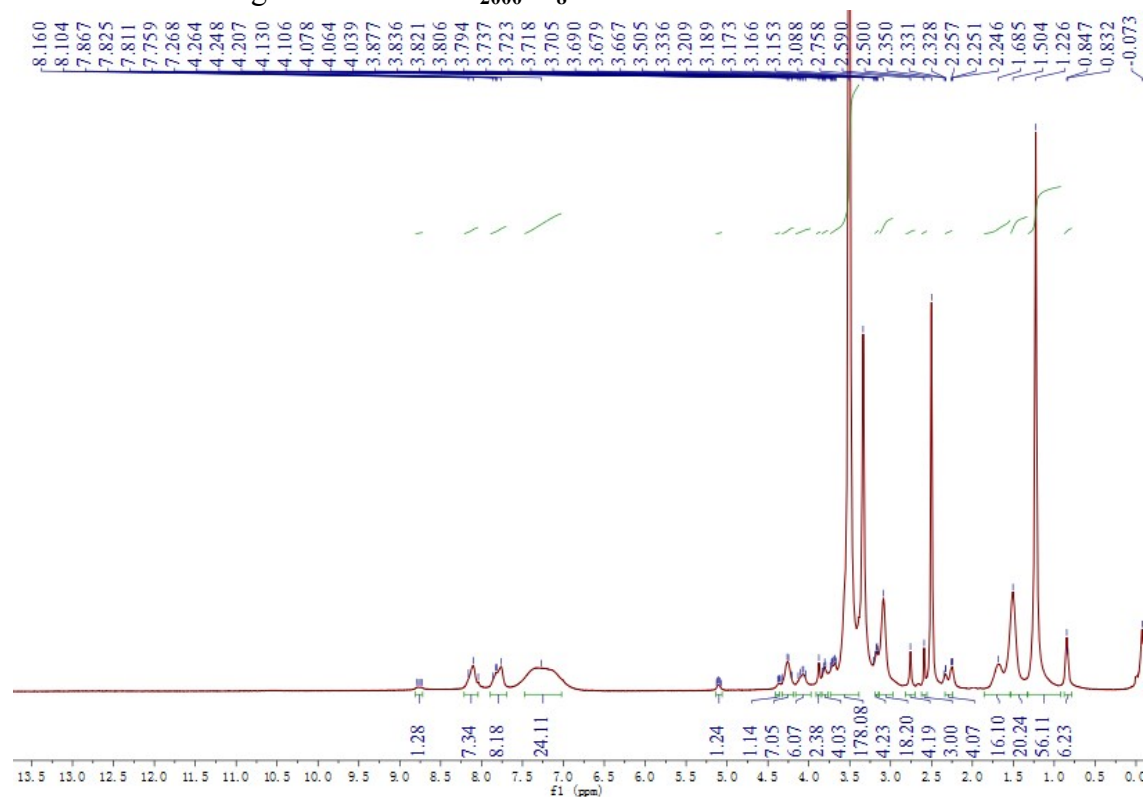



Figure S27. HR-MS of compound DSPE-PEG<sub>2000</sub>-R<sub>8</sub>

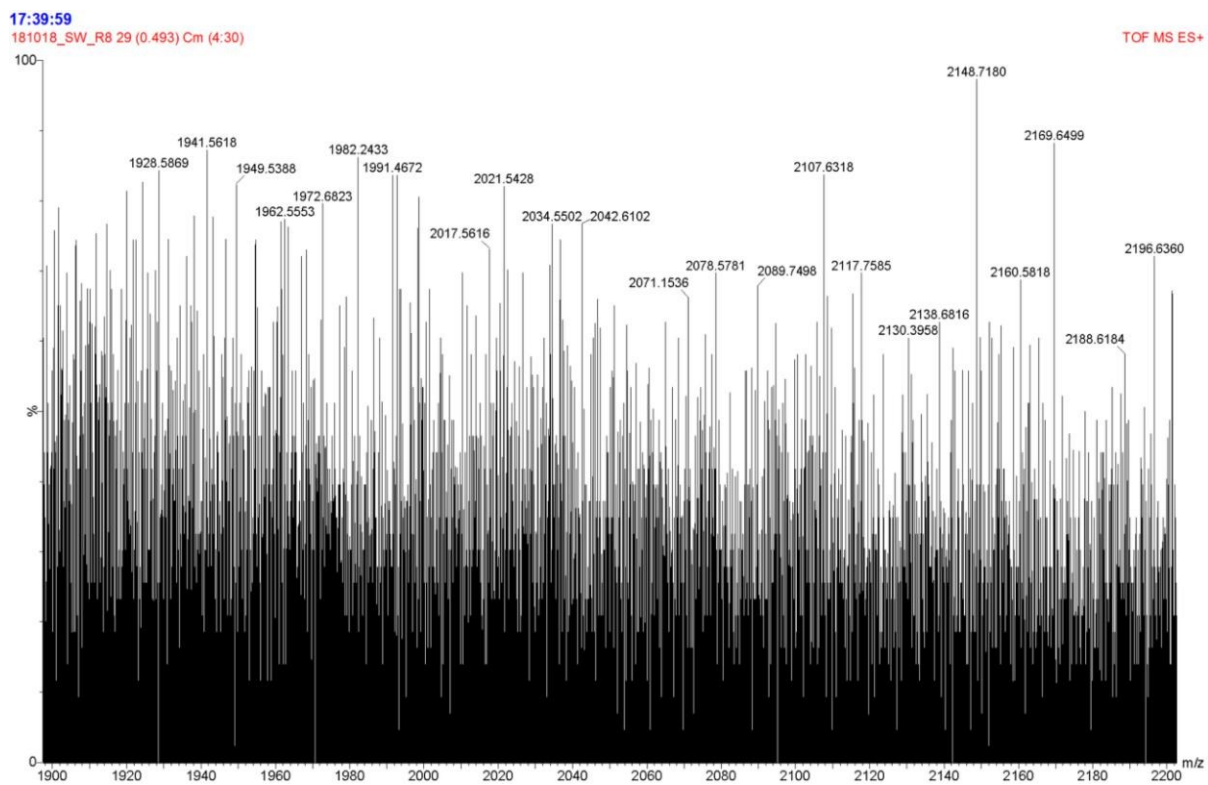

Supplement: d0bm01950j1.pdf [file d0bm01950j1.pdf]
